# Supplementary material for: The power of FDG-PET to detect treatment effects is increased by glucose correction using a Michaelis constant
Source: PubMed Central journal article supplement (PMC3472222; doi:10.1186/2191-219x-2-35), 2012-06-27
Supplement: 2191-219X-2-35-S1.pdf [file 2191-219X-2-35-S1.pdf]

Additional File 1 – FDG PET data in vivo  
for the three true treatment studies

## FDG-PET response of HCT116 colorectal tumors treated with GDC-0973 (10 mg/kg, P.O. daily)

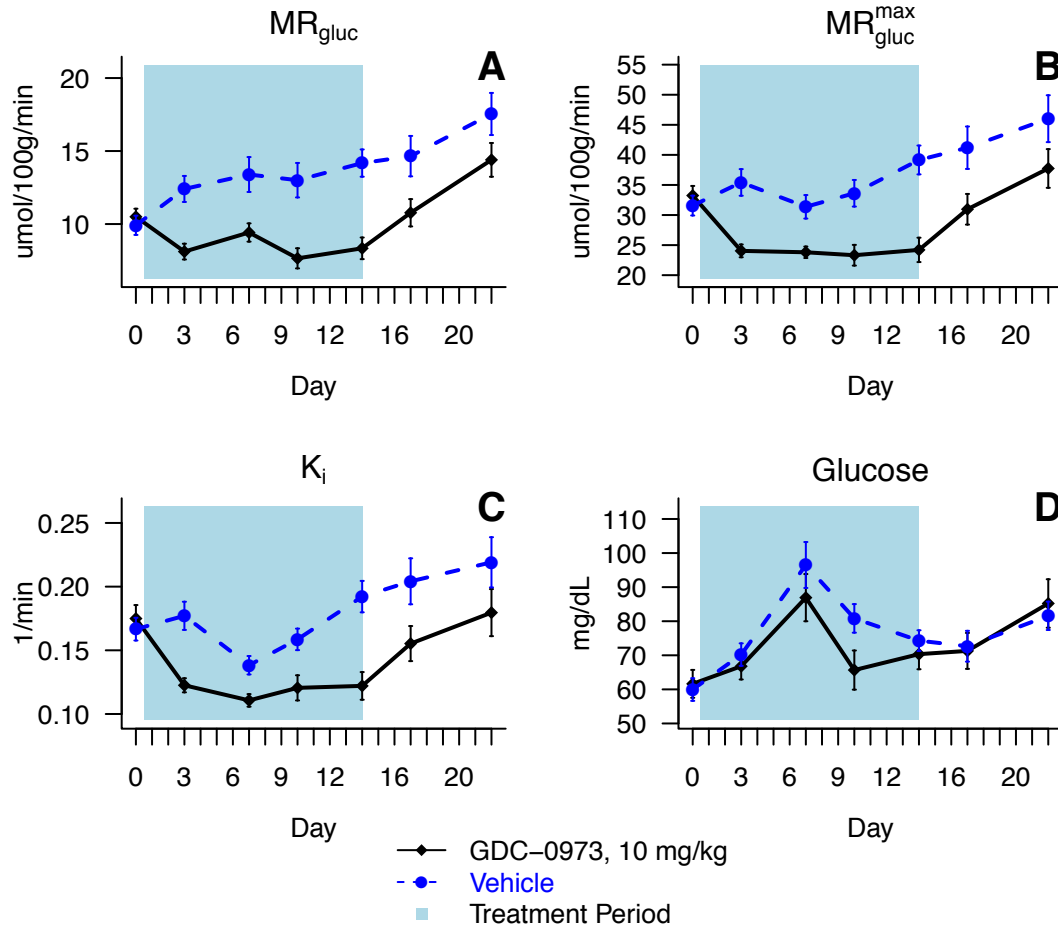

Note: Normal fasting procedure is to move the animals into a clean cage with no food. The day 7 spike in glucose levels was caused by erroneously leaving the animals in their old cages while simply removing the food basket – evidently this is less effective.

## FDG-PET response of A2058 melanoma treated with G00033054 (25 mg/kg, P.O. daily)

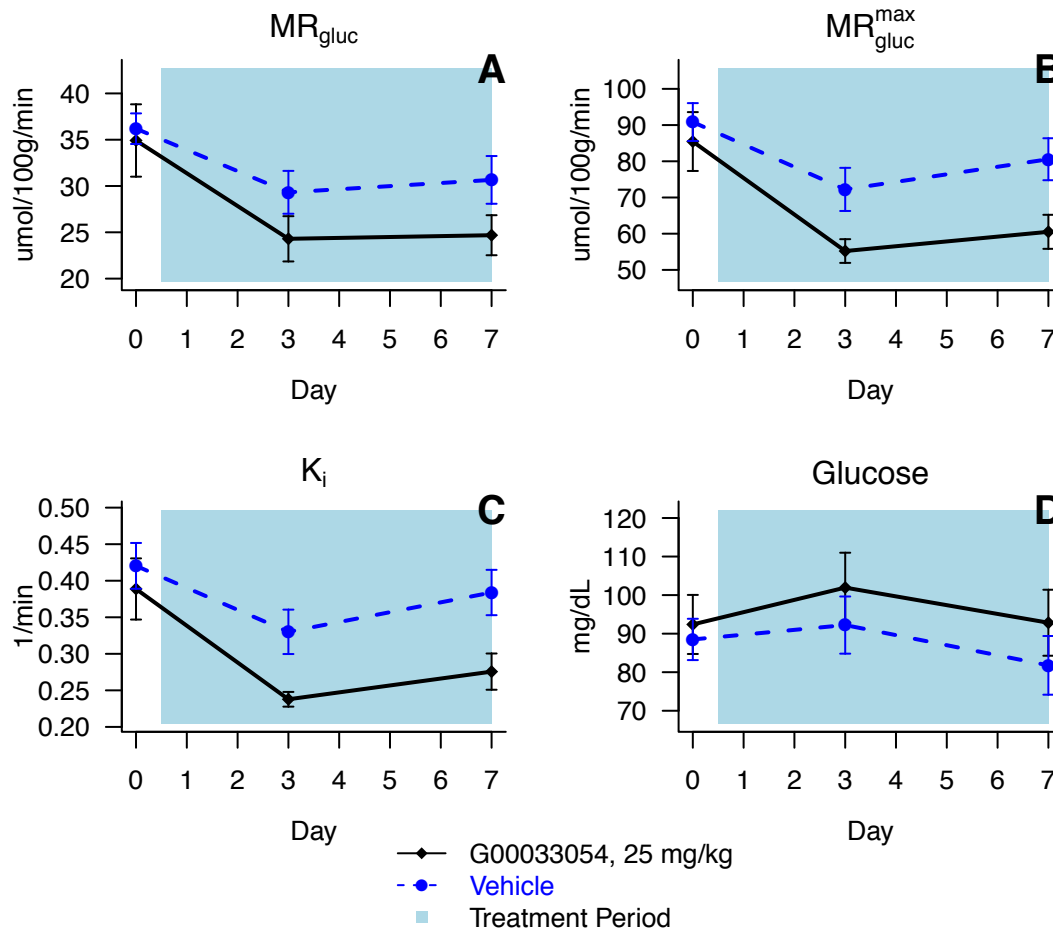

Longitudinal study of A2058 melanoma tumors in 9 mice per group studies over 7 days. The panels show the behavior of  $MR_{gluc}$  (A),  $MR_{gluc}^{max}$  (B),  $K_i$  (C), and blood glucose (D).

## FDG-PET response of A375 melanoma tumors treated with GDC-0879 (100 mg/kg, P.O. daily)

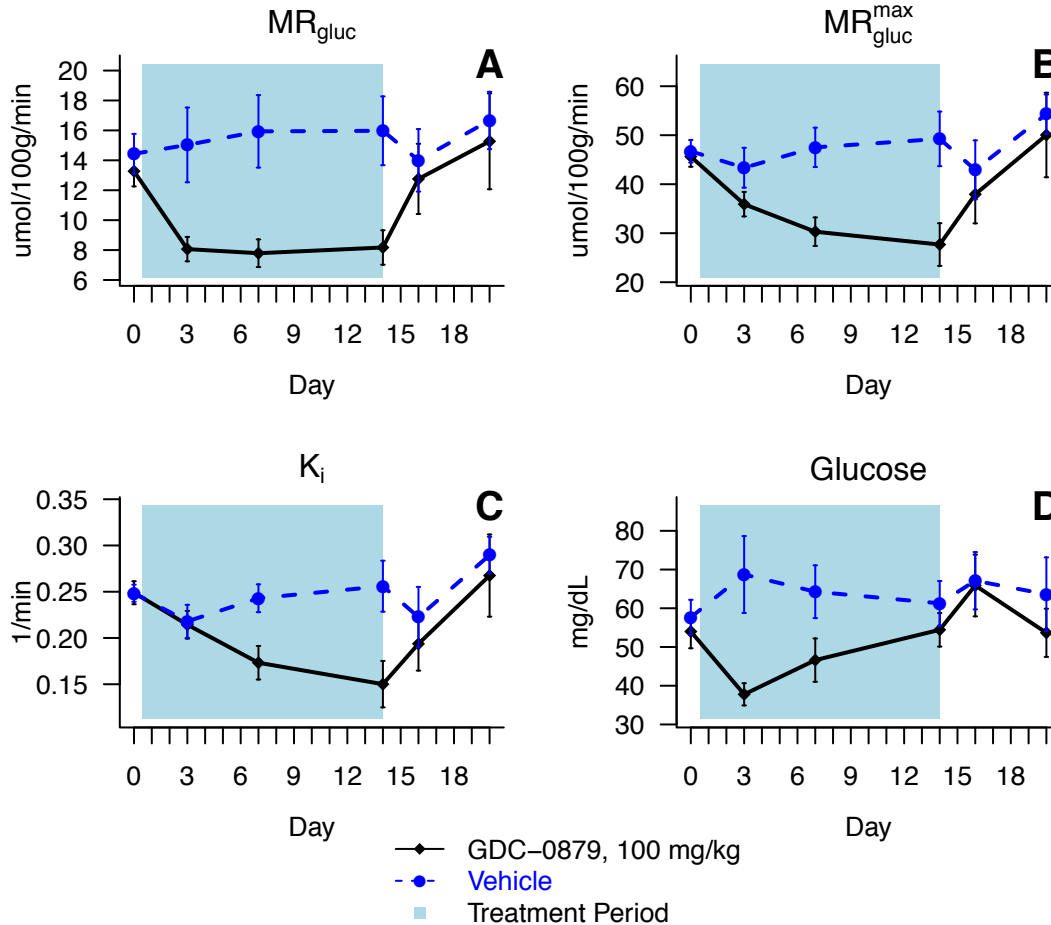

Note: On day 3, treatment groups showed very different glucose numbers between each other. Since the systematic glucose bias is present in both treatment groups in opposite directions,  $MR_{gluc}$  detected an apparent treatment effect, while  $K_i$  does not detect any difference at all.
